# Supplementary material
Source: MDPI journal article supplement (https://www.mdpi.com/2073-4441/11/1/12)
Supplement: s1 [file s1]

## Supplementary Materials

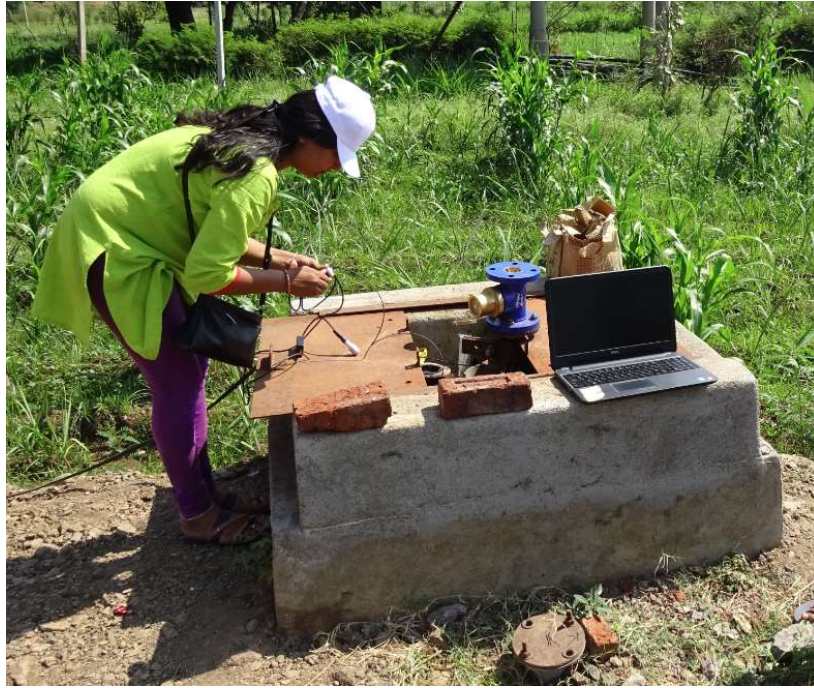

**Figure S1.** RBF well in Village 3 during logger data retrieval by co-author Mrs. K. Patil (Source: T. Boving).

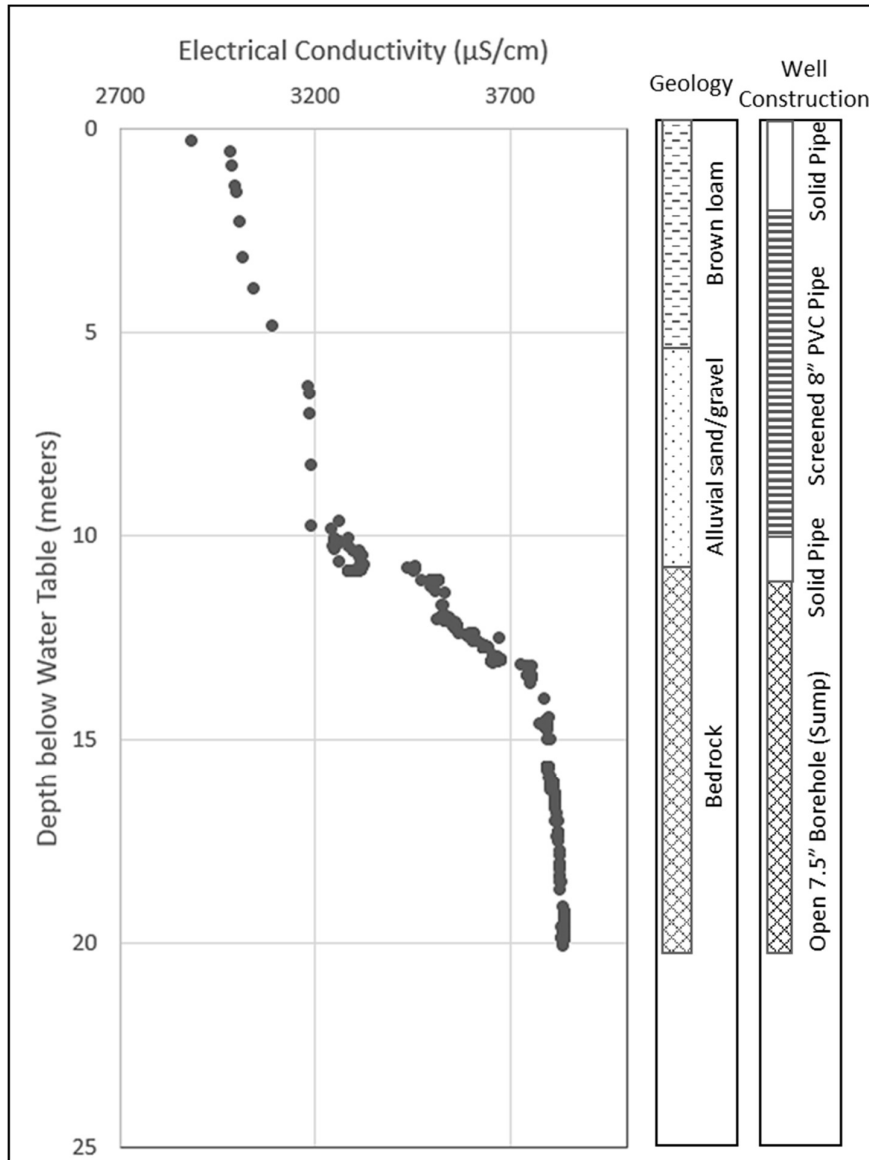

**Figure S2.** Vertical EC profile measured in RBF2 well at Village 4 in relation to the geologic profile and the well construction diagram. Reference level: Water table. At this location, the depth from the surface to the water table was 4.6 m. The brown loam above the alluvial sediment continued to the surface.

**Table S1.** Methods used for analysis of water samples. IS 3025—Bureau of Indian Standards (BIS) (Part 45) Method of Sampling and Test (Physical and Chemical) for Water and Wastewater (First Revision). APHA: Standard Methods for the Examination of Wastewater, America Public Health Association. Washington, DC, USA.

| LIST OF PARAMETER |                                             |                                            |
|-------------------|---------------------------------------------|--------------------------------------------|
| Sr.No             | PARAMETER                                   | TEST METHOD                                |
| 1                 | Potassium as K                              | mg/ltr IS 3025: Part 45                    |
| 2                 | Sodium as Na                                | mg/ltr IS 3025: Part 45                    |
| 3                 | Calcium as Ca                               | mg/ltr IS 3025: Part 40                    |
| 4                 | Magnesium as Mg                             | mg/ltr IS 3025: Part 46                    |
| 5                 | Ammonium as Ammoniacal Nitrogen             | mg/ltr IS 3025: Part 34                    |
| 6                 | Boron as B                                  | mg/ltr IS 3025: Part 57                    |
| 7                 | Chlorides as Cl                             | mg/ltr IS 3025: Part 32                    |
| 8                 | Sulphates as SO <sub>4</sub>                | mg/ltr IS 3025: Part 24                    |
| 9                 | Carbonates as CO <sub>3</sub>               | mg/ltr IS 3025: Part 51                    |
| 10                | Bicarbonates as HCO <sub>3</sub>            | mg/ltr IS 3025: Part 51                    |
| 11                | Fluorides as F                              | mg/ltr APHA 22 <sup>nd</sup> Edition       |
| 12                | Phosphates as PO <sub>4</sub>               | mg/ltr IS 3025: Part 31                    |
| 13                | Nitrates as NO <sub>3</sub>                 | mg/ltr APHA 22 <sup>nd</sup> Edition       |
| 14                | Nitrites as NO <sub>2</sub>                 | mg/ltr IS 3025: Part 34                    |
| 15                | Bio-Chemical Oxygen demand (3 days at 24°C) | mg/ltr IS 3025: Part 44                    |
| 16                | Chemical Oxygen Demand                      | mg/ltr APHA 22 <sup>nd</sup> Edition       |
| 17                | Residual Chlorine                           | mg/ltr IS 3025: Part 26                    |
| 18                | Total Suspended Solids                      | mg/ltr IS 3025: Part 17                    |
| 19                | Fixed Solids                                | mg/ltr IS 3025: Part 18                    |
| 20                | Alkalinity to Phenolphthalein               | mg/ltr IS 3025: 1964                       |
| 21                | Reactive Silica                             | mg/ltr IS 3025: Part 35                    |
| 22                | Total Dissolved Solids                      | mg/ltr IS 3025: Part 16                    |
| 23                | Total Alkalinity as CaCO <sub>3</sub>       | mg/ltr IS 3025: Part 23                    |
| 24                | Total Hardness as CaCO <sub>3</sub>         | mg/ltr IS 3025: Part 21                    |
| 25                | Manganese as Mn                             | mg/ltr APHA 22 <sup>nd</sup> Edition       |
| 26                | Iron as Fe                                  | mg/ltr IS 3025: Part 53                    |
| 27                | Total Organic Carbon                        | mg/ltr APHA 22 <sup>nd</sup> Edition 5310B |

**Table S2.** Water quality parameters analyzed and BIS (2012) drinking water quality standards, where available. ND = Not defined.

| Parameter                                       | Unit       | IS 10500:2012     |                    |
|-------------------------------------------------|------------|-------------------|--------------------|
|                                                 |            | Acceptable Limits | Permissible Limits |
| <b>Major ions</b>                               |            |                   |                    |
| Calcium as Ca                                   | mg/L       | 75                | 200                |
| Magnesium as Mg                                 | mg/L       | 30                | 100                |
| Sodium as Na                                    | mg/L       | ND                | ND                 |
| Potassium as K                                  | mg/L       | ND                | ND                 |
| Boron as B                                      | mg/L       | 0.5               | 1                  |
| Reactive Silica                                 | mg/L       | ND                | ND                 |
| Bicarbonates as HCO <sub>3</sub>                | mg/L       | ND                | ND                 |
| Carbonates as CO <sub>3</sub>                   | mg/L       | ND                | ND                 |
| Chlorides as Cl                                 | mg/L       | 250               | 1000               |
| Sulfates as SO <sub>4</sub>                     | mg/L       | 200               | 400                |
| Fluorides as F                                  | mg/L       | 1                 | 1.5                |
| Nitrates as NO <sub>3</sub>                     | mg/L       | 45                | 45                 |
| Nitrites as NO <sub>2</sub>                     | mg/L       | ND                | ND                 |
| Phosphates as PO <sub>4</sub>                   | mg/L       | ND                | ND                 |
| Ammonium as Ammoniacal Nitrogen                 | mg/L       | 0.5               | 0.5                |
| <b>Bacteria</b>                                 |            |                   |                    |
| E.coli                                          | MPN/100 ml | 0                 | 0                  |
| Total Coliform                                  | MPN/100 ml | 0                 | 0                  |
| <b>Other Parameters</b>                         |            |                   |                    |
| pH                                              |            | 6.5-8.5           | 6.5-8.5            |
| Conductivity                                    | μS/cm      | ND                | ND                 |
| Dissolved Oxygen                                | DO         | ND                | ND                 |
| Temperature                                     | °C         | ND                | ND                 |
| Turbidity                                       | NTU        | 1                 | 5                  |
| Biochemical Oxygen Demand (BOD: 3 days at 27°C) | mg/L       | ND                | ND                 |
| Chemical Oxygen Demand (COD)                    | mg/L       | ND                | ND                 |
| Total Organic Carbon (TOC)                      | mg/L       | ND                | ND                 |
| Total Suspended Solids (TSS)                    | mg/L       | ND                | ND                 |
| Total Dissolved Solids (TDS)                    | mg/L       | 500               | 2000               |
| Total Alkalinity as CaCO <sub>3</sub>           | mg/L       | 200               | 600                |
| Total Hardness as CaCO <sub>3</sub>             | mg/L       | 200               | 600                |

**Table S3.** Sampling results for major ion concentrations in RBF wells, the Krishna River, and groundwater (mg/L). HP: Handpump, BW: Borewell. The listed data only include samples that passed quality control.

| Location             | Date       | Ca    | Mg    | Na    | K    | B   | HCO3  | CO3   | Cl    | SO4    | F   | NO3   | NO2  | PO4   | SiO2 |
|----------------------|------------|-------|-------|-------|------|-----|-------|-------|-------|--------|-----|-------|------|-------|------|
| <b>RBF Wells</b>     |            |       |       |       |      |     |       |       |       |        |     |       |      |       |      |
| Village 1 RBF1+2     | 11-Jan-17  | 40.1  | 91.2  | 283.0 | 2.5  | 0.0 | 440.8 | 71.7  | 159.8 | 163.9  | 0.5 | 14.4  | NA   | 0.7   | 24.1 |
| Village 1 RBF1+2     | 16-Feb-17  | 52.1  | 75.4  | 301.0 | 6.0  | 0.0 | 492.0 | 48.0  | 170.4 | 239.9  | 0.4 | 13.5  | 0.0  | 0.9   | 28.1 |
| Village 1 RBF1+2     | 17-Mar-17  | 60.1  | 99.7  | 297.0 | 7.0  | 0.0 | 434.0 | 70.0  | 138.5 | 188.9  | 0.4 | 36.0  | 0.0  | 0.7   | 21.5 |
| Village 1 RBF1+2     | 19-May-17  | 40.1  | 102.1 | 360.0 | 2.5  | 0.0 | 478.0 | 30.0  | 213.0 | 189.6  | 0.5 | 33.5  | 0.0  | 0.5   | 20.7 |
| Village 1 RBF1+2     | 4-Jul-17   | 32.1  | 94.4  | 347.0 | 2.6  | 0.0 | 478.0 | 70.0  | 220.1 | 144.3  | 0.4 | 34.8  | 0.0  | 0.4   | 55.6 |
| Village 1 RBF1+2     | 25-Jul-17  | 28.9  | 100.2 | 344.0 | 2.7  | 0.0 | 462.0 | 70.0  | 205.9 | 343.4  | 0.5 | 41.3  | 0.1  | 0.6   | 46.2 |
| Village 1 RBF1+2     | 24-Aug-17  | 32.1  | 113.8 | 326.0 | 0.8  | 0.0 | 445.0 | 118.0 | 216.6 | 164.0  | 0.5 | 38.2  | 0.0  | 0.1   | 48.4 |
| Village 1 RBF1+2     | 28-Sep-17  | 33.7  | 81.8  | 363.0 | 2.2  | 0.0 | 486.0 | 90.0  | 564.5 | 119.7  | 0.6 | 21.0  | 0.0  | 0.7   | 49.6 |
| Village 1 RBF1+2     | 24-Oct-17  | 43.3  | 36.0  | 311.6 | 2.3  | 0.0 | 424.0 | 64.0  | 92.3  | 75.7   | 0.6 | 47.8  | 0.0  | 0.8   | 48.8 |
| Village 2            | 16-Feb-17  | 88.2  | 299.1 | 556.0 | 6.0  | 0.0 | 430.0 | 50.0  | 582.2 | 996.9  | 0.9 | 11.5  | 0.0  | 1.1   | 35.3 |
| Village 2            | 17-Mar-17  | 80.2  | 359.9 | 573.0 | 8.0  | 0.0 | 252.0 | 96.0  | 646.1 | 876.5  | 1.0 | 22.4  | 0.1  | 0.9   | 63.8 |
| Village 2            | 19-May-17  | 128.3 | 367.2 | 405.5 | 3.2  | 0.0 | 434.0 | 10.0  | 752.6 | 553.6  | 1.0 | 30.6  | 0.0  | 0.7   | 28.7 |
| Village 2            | 25-Jul-17  | 40.1  | 216.0 | 700.0 | 2.6  | 0.0 | 358.0 | 102.0 | 518.3 | 848.3  | 0.9 | 35.2  | 0.0  | 1.0   | 64.6 |
| Village 2            | 24-Aug-17  | 48.1  | 161.5 | 506.0 | 0.1  | 0.0 | 368.0 | 64.0  | 450.9 | 358.8  | 0.9 | 31.4  | 0.0  | 0.7   | 67.3 |
| Village 2            | 28-Sep-17  | 20.8  | 217.9 | 470.0 | 2.3  | 0.0 | 422.0 | 86.0  | 468.6 | 355.2  | 1.0 | 32.7  | 0.0  | 1.0   | 64.8 |
| Village 3            | 11-Jan-17  | 60.1  | 124.0 | 376.0 | 4.0  | 0.0 | 234.0 | 25.2  | 426.0 | 238.3  | 0.6 | 47.8  | NA   | 0.2   | 73.0 |
| Village 3            | 17-Mar-17  | 100.2 | 75.4  | 304.0 | 5.0  | 0.0 | 304.0 | 28.0  | 319.5 | 422.9  | 0.4 | 33.8  | 0.0  | 0.2   | 67.7 |
| Village 3            | 19-May-17  | 48.1  | 99.7  | 630.0 | 2.2  | 0.0 | 224.0 | 40.0  | 344.4 | 656.1  | 0.6 | 41.9  | 0.0  | 0.1   | 28.0 |
| Village 3            | 4-Jul-17   | 33.7  | 132.3 | 462.0 | 2.3  | 0.0 | 342.0 | 52.0  | 489.9 | 172.5  | 0.6 | 52.4  | 0.0  | 0.0   | 77.1 |
| Village 3            | 25-Jul-17  | 24.1  | 106.0 | 404.0 | 2.2  | 0.0 | 256.0 | 44.0  | 408.3 | 379.3  | 0.5 | 51.6  | 0.0  | 0.1   | 68.7 |
| Village 3            | 24-Oct-17  | 78.6  | 101.2 | 309.6 | 1.8  | 0.0 | 268.0 | 32.0  | 379.9 | 175.5  | 0.7 | 44.4  | 0.0  | 0.0   | 94.8 |
| Village 3            | 11-Jan-17  | 56.1  | 116.7 | 260.0 | 3.0  | 0.0 | 271.1 | 19.6  | 319.5 | 264.0  | 0.6 | 39.7  | NA   | 0.3   | 77.1 |
| Village 3            | 17-Mar-17  | 72.1  | 94.8  | 267.0 | 5.0  | 0.0 | 306.0 | 10.0  | 273.4 | 241.9  | 0.4 | 31.5  | 0.0  | 0.2   | 70.1 |
| Village 3            | 2-May-17   | 80.2  | 111.9 | 386.0 | 2.5  | 0.0 | 328.0 | 11.2  | 447.3 | 178.6  | 0.5 | 24.5  | 0.0  | 0.1   | 51.6 |
| Village 3            | 4-Jul-17   | 70.5  | 166.4 | 430.0 | 2.3  | 0.0 | 422.0 | 14.0  | 568.0 | 252.4  | 0.6 | 61.5  | 0.0  | 0.0   | 79.0 |
| Village 3            | 25-Jul-17  | 41.7  | 106.0 | 387.0 | 2.3  | 0.0 | 234.0 | 42.0  | 429.6 | 510.0  | 0.6 | 54.8  | 0.0  | 0.1   | 67.9 |
| Village 3            | 24-Aug-17  | 67.3  | 178.0 | 404.0 | 0.4  | 0.0 | 447.0 | 18.0  | 497.0 | 246.0  | 0.6 | 60.6  | 0.0  | 0.0   | 71.6 |
| Village 3            | 28-Sep-17  | 80.2  | 88.5  | 179.0 | 2.1  | 0.0 | 412.0 | 32.0  | 230.8 | 140.8  | 0.4 | 35.9  | 0.1  | 0.1   | 45.8 |
| Village 3            | 24-Oct-17  | 89.8  | 124.5 | 325.0 | 1.9  | 0.0 | 164.0 | 24.0  | 440.2 | 183.0  | 0.7 | 50.7  | 0.0  | 0.0   | 70.8 |
| Village 3            | 15-Dec-17  | 68.1  | 138.6 | 411.0 | 6.8  | 0.0 | 154.0 | 16.0  | 394.1 | 1209.7 | 0.2 | 42.7  | 0.1  | 0.0   | 64.3 |
| Village 4            | 1/11/2017  | 100.2 | 170.2 | 248.0 | 2.0  | 0.0 | 190.9 | 22.7  | 532.5 | 264.0  | 0.6 | 65.9  | NA   | 0.0   | 11.7 |
| Village 4            | 3/17/2017  | 128.3 | 26.8  | 246.0 | 4.0  | 0.0 | 316.0 | 36.0  | 404.7 | 215.0  | 0.5 | 60.8  | 0.0  | 0.1   | 46.1 |
| Village 4            | 5/2/2017   | 136.3 | 145.9 | 297.0 | 1.7  | 0.0 | 190.0 | 224.0 | 447.3 | 266.5  | 0.4 | 73.3  | 0.0  | 0.1   | 27.2 |
| Village 4            | 5/19/2017  | 132.3 | 150.8 | 289.0 | 1.5  | 0.0 | 116.0 | 0.0   | 443.8 | 410.0  | 0.6 | 57.3  | 0.0  | 0.0   | 20.1 |
| Village 4            | 7/4/2017   | 142.7 | 153.7 | 262.0 | 1.6  | 0.0 | 332.0 | 10.0  | 486.4 | 194.5  | 0.5 | 70.6  | 0.0  | 0.0   | 42.6 |
| Village 4            | 7/25/2017  | 75.4  | 146.9 | 293.0 | 1.8  | 0.0 | 242.0 | 52.0  | 479.3 | 576.6  | 0.5 | 91.7  | 0.0  | 0.1   | 38.0 |
| Village 4            | 8/24/2017  | 75.4  | 180.0 | 289.0 | 0.3  | 0.0 | 305.0 | 22.0  | 461.5 | 156.3  | 0.5 | 66.1  | 0.1  | 0.0   | 41.7 |
| Village 4            | 9/28/2017  | 78.6  | 123.6 | 227.0 | 0.8  | 0.0 | 118.0 | 38.0  | 458.0 | 195.4  | 0.4 | 49.3  | 0.1  | 0.1   | 41.1 |
| Village 4            | 10/24/2017 | 24.1  | 173.2 | 260.8 | 1.8  | 0.0 | 142.0 | 38.0  | 493.5 | 175.5  | 0.6 | 33.5  | 0.0  | 0.0   | 40.5 |
| Village 4            | 5/2/2017   | 160.3 | 209.2 | 233.0 | 2.6  | 0.0 | 130.0 | 3.8   | 571.6 | 253.7  | 0.4 | 129.5 | 0.1  | 0.2   | 33.3 |
| Village 4            | 5/19/2017  | 216.4 | 211.6 | 243.0 | 2.6  | 0.0 | 48.0  | 0.0   | 699.4 | 194.8  | 0.6 | 237.5 | 0.3  | 0.0   | 21.9 |
| Village 4            | 7/4/2017   | 43.3  | 256.8 | 207.0 | 2.3  | 0.0 | 314.0 | 0.0   | 504.1 | 131.5  | 0.4 | 77.0  | 0.0  | 0.0   | 53.7 |
| Village 4            | 7/25/2017  | 62.5  | 228.6 | 192.0 | 2.4  | 0.0 | 256.0 | 0.0   | 518.3 | 284.5  | 0.5 | 71.3  | 0.1  | 0.0   | 44.3 |
| Village 4            | 8/24/2017  | 81.8  | 245.2 | 182.0 | 0.8  | 0.0 | 300.0 | 0.0   | 532.5 | 164.0  | 0.4 | 63.1  | 0.0  | 0.0   | 46.8 |
| Village 4            | 9/28/2017  | 57.7  | 200.0 | 201.0 | 1.9  | 0.0 | 272.0 | 0.0   | 529.0 | 130.0  | 0.4 | 69.6  | 0.0  | 0.2   | 44.3 |
| <b>Krishna River</b> |            |       |       |       |      |     |       |       |       |        |     |       |      |       |      |
| Village 1            | 16-Feb-17  | 16.0  | 26.8  | 114.0 | 3.0  | 0.0 | 146.0 | 14.0  | 88.8  | 98.9   | 0.3 | 33.4  | 0.0  | 0.1   | 13.6 |
| Village 1            | 2-May-17   | 24.1  | 17.0  | 39.0  | 2.2  | 0.0 | 83.0  | 14.0  | 32.0  | 16.2   | 0.1 | 1.4   | 0.0  | 0.0   | 11.9 |
| Village 1            | 19-May-17  | 24.1  | 29.2  | 31.0  | 1.8  | 0.0 | 100.0 | 8.0   | 49.7  | 64.1   | 0.3 | 2.2   | 0.0  | 0.0   | 11.6 |
| Village 1            | 4-Jul-17   | 14.4  | 5.8   | 15.1  | 2.0  | 0.0 | 40.0  | 0.0   | 21.3  | 12.1   | 0.1 | 11.0  | 0.0  | 0.0   | 17.1 |
| Village 1            | 25-Jul-17  | 17.6  | 2.9   | 11.2  | 1.7  | 0.0 | 64.0  | 0.0   | 17.8  | 27.7   | 0.1 | 6.8   | 0.0  | 0.1   | 0.2  |
| Village 1            | 28-Sep-17  | 35.3  | 22.4  | 31.7  | 3.5  | 0.0 | 92.0  | 20.0  | 42.6  | 27.0   | 0.2 | 9.7   | 0.0  | 0.3   | 20.3 |
| Village 1            | 24-Oct-17  | 50.3  | 20.4  | 46.8  | 3.6  | 0.0 | 136.0 | 8.0   | 63.9  | 33.5   | 0.4 | 17.2  | 0.0  | 0.3   | 28.7 |
| Village 1            | 15-Nov-17  | 44.9  | 21.4  | 64.9  | 2.9  | 0.0 | 122.0 | 14.0  | 81.7  | 27.0   | 0.8 | 12.5  | 0.1  | 0.0   | 8.4  |
| Village 2            | 11-Jan-17  | 48.1  | 7.3   | 100.0 | 2.0  | 0.0 | 122.3 | 16.0  | 106.5 | 51.8   | 0.3 | 4.7   | NA   | 0.0   | 4.0  |
| Village 2            | 19-May-17  | 28.1  | 34.1  | 40.0  | 1.8  | 0.0 | 134.0 | 10.0  | 46.2  | 148.6  | 0.2 | 2.0   | 0.0  | 0.0   | 9.5  |
| Village 2            | 4-Jul-17   | 9.6   | 9.7   | 13.0  | 1.6  | 0.0 | 38.0  | 0.0   | 21.3  | 15.1   | 0.1 | 9.6   | 0.0  | 0.0   | 14.4 |
| Village 2            | 25-Jul-17  | 17.6  | 10.7  | 14.2  | 12.0 | 0.0 | 50.0  | 10.0  | 14.2  | 27.7   | 0.2 | 6.8   | 0.1  | 0.1   | 16.7 |
| Village 2            | 24-Aug-17  | 14.4  | 10.7  | 20.2  | 0.8  | 0.0 | 60.0  | 0.0   | 21.3  | 5.6    | 0.1 | 3.1   | 0.0  | 0.0   | 14.7 |
| Village 2            | 28-Sep-17  | 40.1  | 14.6  | 65.7  | 4.5  | 0.0 | 94.0  | 30.0  | 53.3  | 18.5   | 0.2 | 10.1  | 0.0  | 0.1   | 22.5 |
| Village 2            | 24-Oct-17  | 12.8  | 46.7  | 37.6  | 0.0  | 0.0 | 126.0 | 18.0  | 60.4  | 21.1   | 0.4 | 15.9  | 0.0  | 0.0   | 28.9 |
| Village 2            | 15-Nov-17  | 43.3  | 23.4  | 64.8  | 3.0  | 0.0 | 112.0 | 16.0  | 78.1  | 24.2   | 0.8 | 12.0  | 0.1  | 0.0   | 18.4 |
| Village 3            | 17-Mar-17  | 76.2  | 75.4  | 208.0 | 6.0  | 0.0 | 148.0 | 20.0  | 234.3 | 215.0  | 0.4 | 2.5   | 0.02 | 0.0   | 11.5 |
| Village 3            | 2-May-17   | 20.0  | 21.9  | 46.2  | 1.8  | 0.0 | 78.0  | 22.0  | 39.1  | 17.4   | 0.2 | 0.1   | 0.0  | 0.0   | 10.7 |
| Village 3            | 4-Jul-17   | 19.2  | 4.9   | 16.0  | 1.8  | 0.0 | 44.0  | 0.0   | 17.8  | 12.1   | 0.1 | 10.9  | 0.0  | 0.0   | 17.8 |
| Village 3            | 25-Jul-17  | 16.0  | 2.3   | 11.1  | 1.7  | 0.0 | 36.0  | 0.0   | 10.7  | 29.2   | 0.0 | 6.8   | 0.0  | 0.1   | 15.7 |
| Village 3            | 24-Aug-17  | 16.0  | 13.6  | 20.1  | 0.8  | 0.0 | 64.0  | 0.0   | 17.8  | 7.9    | 0.2 | 4.8   | 0.0  | 0.0   | 17.1 |
| Village 3            | 28-Sep-17  | 40.1  | 15.6  | 36.2  | 3.2  | 0.0 | 110.0 | 22.0  | 52.3  | 21.4   | 0.2 | 10.9  | 0.0  | 0.2   | 25.2 |
| Village 3            | 24-Oct-17  | 40.1  | 30.2  | 44.5  | 3.0  | 0.0 | 122.0 | 14.0  | 67.5  | 34.5   | 0.4 | 14.2  | 0.0  | 0.3   | 27.5 |
| Village 3            | 15-Nov-17  | 52.9  | 23.4  | 73.1  | 3.2  | 0.0 | 114.0 | 26.0  | 88.8  | 32.7   | 0.7 | 13.6  | 0.1  | 0.0   | 23.7 |
| Village 4            | 1/11/2017  | 80.2  | 58.4  | 206.0 | 2.0  | 0.0 | 96.8  | 10.3  | 284.0 | 220.7  | 0.4 | 2.6   | NA   | 0.0   | 21.7 |
| Village 4            | 3/17/2017  | 124.3 | 107.0 | 326.0 | 8.0  | 0.0 | 136.0 | 20.0  | 447.3 | 343.4  | 0.5 | 3.3   | 0.0  | 0.0   | 11.5 |
| Village 4            | 7/4/2017   | 20.8  | 3.9   | 15.5  | 1.9  | 0.0 | 42.0  | 0.0   | 17.8  | 15.6   | 0.1 | 11.1  | 0.0  | 0.0</ |      |

| Location              | Date      | Ca    | Mg    | Na    | K    | B   | HCO3  | CO3  | Cl    | SO4    | F   | NO3   | NO2 | PO4 | SiO2 |
|-----------------------|-----------|-------|-------|-------|------|-----|-------|------|-------|--------|-----|-------|-----|-----|------|
| Village 1 BW          | 21-Dec-17 | 100.2 | 73.0  | 440.0 | 9.7  | 0.0 | 124.0 | 6.0  | 362.1 | 211.1  | 1.2 | 77.6  | 0.0 | 0.0 | 29.3 |
| Village 1 HP          | 15-Feb-18 | 112.2 | 289.4 | 841.0 | 4.2  | 0.0 | 230.0 | 0.0  | 653.2 | 952.3  | 1.4 | 211.0 | 0.1 | 0.0 | 47.0 |
| Village 2 HP          | 21-Dec-17 | 280.6 | 359.9 | 939.0 | 9.5  | 0.0 | 66.0  | 4.0  | 731.3 | 1117.1 | 0.9 | 221.2 | 0.1 | 0.0 | 66.0 |
| Village 2 BW          | 15-Feb-18 | 300.6 | 518.0 | 844.0 | 4.0  | 0.0 | 190.0 | 0.0  | 639.0 | 1513.5 | 1.1 | 209.4 | 0.1 | 0.0 | 66.1 |
| Village 2 HP          | 21-Dec-17 | 188.4 | 138.6 | 443.0 | 20.6 | 0.0 | 108.0 | 12.0 | 411.8 | 741.3  | 0.5 | 19.5  | 0.0 | 0.0 | 22.2 |
| Village 4 HP (120 ft) | 21-Dec-17 | 180.4 | 272.4 | 456.0 | 6.0  | 0.0 | 64.0  | 46.0 | 745.5 | 178.1  | 0.4 | 480.0 | 0.1 | 0.0 | 41.5 |
| Village 4 HP (120 ft) | 15-Feb-18 | 216.4 | 313.7 | 436.0 | 6.9  | 0.0 | 170.0 | 10.0 | 738.4 | 227.8  | 0.5 | 330.5 | 2.6 | 0.0 | 37.0 |
| Village 4 HP (70 ft)  | 10-Feb-17 | 36.9  | 297.7 | 310.0 | 2.0  | ND  | 292.0 | 20.0 | 727.8 | 170.4  | 0.5 | 287.5 | 0.5 | 0.1 | 49.4 |
| Village 4 HP (70 ft)  | 21-Dec-17 | 300.6 | 228.6 | 293.0 | 8.1  | 0.0 | 60.0  | 0.0  | 809.4 | 128.7  | 0.3 | 377.0 | 4.0 | 0.1 | 31.5 |
| Village 4 HP (70 ft)  | 15-Feb-18 | 96.2  | 452.4 | 424.0 | 4.1  | 0.0 | 230.0 | 0.0  | 710.0 | 870.0  | 0.7 | 503.5 | 0.0 | 0.0 | 47.2 |



| Location  | Date      | pH   | EC (µs/cm) | DO (mg/L) | Turbidity (NTU) | E.coli (MPN/100 ml) |
|-----------|-----------|------|------------|-----------|-----------------|---------------------|
| River     |           |      |            |           |                 |                     |
| Village 1 | 1-Dec-15  | 8.6  | 824        | 8.89      | 9.1             |                     |
| Village 1 | 9-Dec-15  | 8.6  | 844        | 9.72      | 9.5             | 24.3                |
| Village 1 | 16-Dec-15 | 8.7  | 903        | 6.82      | 10.23           | 33.6                |
| Village 1 | 22-Dec-15 | 8.5  | 1001       | 7.82      | 9.54            | 43.5                |
| Village 1 | 30-Dec-15 | 8.5  | 1040       | 7.04      | 12.6            | 48                  |
| Village 1 | 5-Jan-16  | 8.5  | 1040       | 6.52      | 7.82            | 131.4               |
| Village 1 | 13-Jan-16 | 8.6  | 1099       | 7.8       | 8.54            | 501.2               |
| Village 1 | 20-Jan-16 | 8.7  | 1040       | 8.4       | 9.24            | 17.5                |
| Village 1 | 29-Jan-16 | 8.5  | 1236       | 7.14      | 11.31           | 39.3                |
| Village 1 | 3-Feb-16  | 8.5  | 1275       | 7.09      | 12.4            | 45.2                |
| Village 1 | 10-Feb-16 | 8.3  | 1354       | 5.46      | 17.6            | 336                 |
| Village 1 | 17-Feb-16 | 8.4  | 1628       | 5.84      | 15.1            | 121                 |
| Village 1 | 25-Feb-16 | 8.3  | 2354       | 6.74      | 17.7            | 2851                |
| Village 1 | 2-Mar-16  | 8.09 | 3669       | 5.87      | NA              | 52.9                |
| Village 1 | 10-Mar-16 | 8.2  | 2982       | 5.89      | NA              | 44.1                |
| Village 1 | 16-Mar-16 | 7.6  | 1903       | 6.83      | NA              | 8.6                 |
| Village 1 | 22-Mar-16 | 7.8  | 1884       | 7.75      | NA              | 9.7                 |
| Village 1 | 28-Mar-16 | 7.7  | 1707       | 6.47      | NA              | 2                   |
| Village 1 | 5-Apr-16  | 8.1  | 2747       | 6.53      | 7.19            | 238.2               |
| Village 1 | 13-Apr-16 | 8.6  | 3728       | 5.95      | 10.7            | 186                 |
| Village 1 | 20-Apr-16 | 8.1  | 2139       | 5.49      | 4.31            | 1011.2              |
| Village 1 | 28-Apr-16 | 7.8  | 1177       | 6.11      | 0.53            | 1011.2              |
| Village 1 | 4-May-16  | 8.5  | 1275       | 10.74     | 5.89            | 21.6                |
| Village 1 | 11-May-16 | 8.3  | 1354       | 7.09      | 8.01            | 53.7                |
| Village 1 | 18-May-16 | 8.4  | 1628       | 6.8       | 17.9            | 17.6                |
| Village 1 | 25-May-16 | 8.3  | 2354       | 4.75      | 57.7            | 549.3               |
| Village 1 | 2-Jun-16  | 8.5  | 746        | 4.15      | 23              | 1011.2              |
| Village 1 | 7-Jun-16  | 8.94 | 500        | 4.41      | 9.65            | 20.1                |
| Village 1 | 15-Jun-16 | 8.57 | 647        | 7.67      | 32.6            | 333.3               |
| Village 1 | 22-Jun-16 | 9.1  | 667        | 6.92      | 15.2            | 1011.2              |
| Village 1 | 29-Jun-16 | 8.75 | 922        | 8.3       | 21.1            | 1011.2              |
| Village 1 | 6-Jul-16  | 8.26 | 216        | 8.47      | 43.3            | 549.3               |
| Village 1 | 13-Jul-16 | 8.26 | 353        | 5.81      | 60.3            | 1011.2              |
| Village 1 | 23-Jul-16 | 7.61 | 373        | 6.12      | 11.5            | 549.3               |
| Village 1 | 28-Jul-16 | 8.21 | 392        | 5.5       | 10.5            | 165.8               |
| Village 1 | 3-Aug-16  | 8.4  | 294        | 5.68      | 28.3            | 1011.2              |
| Village 1 | 19-Aug-16 | 8.22 | 334        | 5.75      | 8.19            | 456.9               |
| Village 1 | 26-Aug-16 | 7.28 | 294        | 7.98      | 10.8            | 44.3                |
| Village 1 | 30-Aug-16 | 8.27 | 334        | 7.79      | 9.31            | 214.2               |
| Village 1 | 8-Sep-16  | 8.62 | 353        | 6.13      | 4.59            | 517.2               |
| Village 1 | 17-Sep-16 | 5.55 | 549        | 6.47      | 5.16            | 109.5               |
| Village 1 | 20-Sep-16 | 8.04 | NA         | 4.87      | 16.2            | 108.1               |
| Village 1 | 27-Sep-16 | 8.55 | NA         | 6.87      | 40.5            | 145.9               |
| Village 1 | 5-Oct-16  | 8.22 | NA         | 4.38      | 13              | 228.2               |
| Village 1 | 14-Oct-16 | 8.06 | NA         | 4.63      | 9.77            | 44.8                |
| Village 1 | 22-Oct-16 | 8.4  | 373        | 5.68      | 28.3            | 3.1                 |
| Village 1 | 26-Oct-16 | 8.3  | 294        | 5.88      | 3.06            | 5.1                 |
| Village 1 | 3-Nov-16  | 8.83 | 589        | 7.97      | 3.77            | 4.1                 |
| Village 1 | 9-Nov-16  | 8.92 | 510        | 7.23      | 17.3            | 68.2                |
| Village 1 | 16-Nov-16 | 8.35 | 667        | 7.03      | 19.8            | 4.1                 |
| Village 1 | 23-Nov-16 | 8.23 | 824        | 6.18      | 20.9            | 30.5                |
| Village 1 | 30-Nov-16 | 8.27 | 667        | 6.51      | 6.2             | 7.3                 |
| Village 1 | 7-Dec-16  | 8.29 | 667        | 5.50      | 2.43            | 2                   |
| Village 1 | 16-Dec-16 | 8.4  | 706        | 4.66      | 3.47            | 2419.6              |
| Village 1 | 21-Dec-16 | 8.5  | 746        | 6.74      | 9.1             | 9.6                 |
| Village 1 | 30-Dec-16 | 8.45 | 706        | 5.55      | 18.2            | 107.6               |
| Village 1 | 4-Jan-17  | 8.3  | 785        | 4.88      | 2.17            | 8.4                 |
| Village 1 | 11-Jan-17 | 8.47 | 824        | 6.58      | 7.39            | 10.9                |
| Village 1 | 19-Jan-17 | 8.2  | 824        | 6.56      | 5.97            | 0.5                 |
| Village 1 | 27-Jan-17 | 8.57 | 863        | 6.86      | 3.64            | 2419.6              |
| Village 1 | 31-Jan-17 | 8.57 | 863        | 5.97      | 4.12            | 85.7                |
| Village 1 | 8-Feb-17  | 8.54 | 785        | 7.42      | 3.6             | 17.3                |
| Village 1 | 15-Feb-17 | 8.44 | 903        | 5.39      | 1.23            | 6.3                 |
| Village 1 | 22-Feb-17 | 8.44 | 981        | 7.70      | 6.1             | 5.2                 |
| Village 1 | 1-Mar-17  | 8.41 | 883        | 6.77      | 4.09            | 116.2               |
| Village 1 | 8-Mar-17  | 8.39 | 981        | 6.58      | 2.3             | 7.2                 |
| Village 1 | 16-Mar-17 | 7.97 | 1275       | 5.69      | 0.78            | 32.3                |
| Village 1 | 22-Mar-17 | 8.26 | 1334       | 7.45      | 3.37            | 13.2                |
| Village 1 | 27-Mar-17 | 8.12 | 1138       | 6.37      | 2.21            | 0.5                 |
| Village 1 | 5-Apr-17  | 8.21 | 1177       | 5.96      | 8.31            | 20.6                |
| Village 1 | 13-Apr-17 | 8.3  | 1373       | 6.27      | 15.4            | 25.9                |
| Village 1 | 19-Apr-17 | 7.99 | 1079       | 6.29      | 24.4            | 50.4                |
| Village 1 | 3-May-17  | 8.58 | 451        | 7.03      | 12.6            | 31.8                |
| Village 1 | 17-May-17 | 8.27 | 549        | 6.34      | 5.31            | 13.2                |
| Village 1 | 19-May-17 | 8.26 | 726        | 5.18      | 9.54            | 9.6                 |
| Village 1 | 24-May-17 | 8.5  | 726        | 6.02      | 7.95            | 119.8               |
| Village 1 | 31-May-17 | 7.92 | 863        | 5.59      | 7.78            | 4.1                 |
| Village 1 | 7-Jun-17  | 8.34 | 687        | 5.63      | 12.3            | 1                   |
| Village 1 | 14-Jun-17 | 8.31 | 726        | 5.71      | 7.65            | 9.6                 |
| Village 1 | 19-Jun-17 | 8.25 | 785        | 2.57      | 12.7            | 4.1                 |
| Village 1 | 29-Jun-17 | 8.36 | 942        | 5.54      | 17.1            | 408.3               |
| Village 1 | 4-Jul-17  | 8.13 | 491        | 5.38      | 13.3            | 135.4               |
| Village 1 | 15-Jul-17 | 8.31 | 235        | 5.70      | 19.8            | 67.7                |
| Village 1 | 17-Jul-17 | 8.19 | 334        | 3.07      | 33.7            | 84.7                |
| Village 1 | 24-Jul-17 | 8.47 | 530        | 5.88      | 25              | 248.1               |
| Village 1 | 2-Aug-17  | 7.77 | 235        | 4.94      | 15.1            | 1046.2              |
| Village 1 | 9-Aug-17  | 7.93 | 196        | 5.02      | 11              | 76.3                |
| Village 1 | 16-Aug-17 | 8.1  | 785        | 4.67      | 8.52            | 21.8                |
| Village 1 | 23-Aug-17 | 7.92 | 804        | 5.45      | 0.68            | 19.7                |
| Village 1 | 24-Aug-17 | 8.36 | 628        | 5.08      | 0.69            | 126.8               |
| Village 1 | 30-Aug-17 | 7.62 | 1177       | 5.09      | 2.69            | 2419.6              |
| Village 1 | 5-Sep-17  | 7.97 | 824        | 5.26      | 9.93            | 365.4               |
| Village 1 | 12-Sep-17 | 8.32 | 549        | 5.31      | 2.71            | 1413.6              |
| Village 1 | 19-Sep-17 | 8.4  | 608        | 5.28      | 5.54            | 365.4               |
| Village 1 | 30-Sep-17 | 7.56 | 706        | 4.95      | 9               | 517.2               |
| Village 1 | 2-Oct-17  | 8.36 | 746        | 5.23      | 4.16            | 290.9               |
| Village 1 | 7-Oct-17  | 7.5  | 647        | 5.15      | 7               | 866.4               |
| Village 1 | 12-Oct-17 | 8.31 | 1236       | 4.99      | 6.26            | 10.2                |
| Village 1 | 17-Oct-17 | 8.69 | 1001       | 5.88      | 13.2            | 9.6                 |
| Village 1 | 24-Oct-17 | 8.36 | 746        | 5.10      | 3.86            | 126.8               |
| Village 1 | 3-Nov-17  | 8.4  | 1059       | 5.78      | 11.6            | 4.1                 |
| Village 1 | 8-Nov-17  | 8.61 | 863        | 5.63      | 9.36            | 113                 |
| Village 1 | 15-Nov-17 | 8.27 | 804        | 5.62      | 4.79            | 44.3                |
| Village 1 | 22-Nov-17 | 8.39 | 824        | 5.50      | 6.76            | 101.7               |
| Village 1 | 28-Nov-17 | 8.41 | 863        | 5.69      | 10.2            | 21.1                |
| Village 1 | 29-Nov-17 | 8.93 | 1020       | 5.78      | 3.06            | 31.8                |
| Village 1 | 6-Dec-17  | 8.7  | 1001       | 4.90      | 2.33            | 6.3                 |
| Village 1 | 13-Dec-17 | 8.74 | 922        | 6.22      | 8.33            | 45.7                |
| Village 1 | 20-Dec-17 | 8.43 | 961        | 5.26      | 3.14            | 19.7                |
| Village 1 | 21-Dec-17 | 8.57 | 1020       | 4.89      | 1.25            | 16                  |
| Village 1 | 26-Dec-17 | 8.6  | 1158       | 4.80      | 8.2             | 31.8                |

| Location  | Date      | pH   | EC (µs/cm) | DO (mg/L) | Turbidity (NTU) | E.coli (MPN/100 ml) |
|-----------|-----------|------|------------|-----------|-----------------|---------------------|
| River     |           |      |            |           |                 |                     |
| Village 2 | 11-Nov-15 | 8.9  | 804        | 9.08      | 9.49            | NA                  |
| Village 2 | 1-Dec-15  | 8.1  | 804        | 8.89      | 7.35            | NA                  |
| Village 2 | 9-Dec-15  | 8.5  | 804        | 10.05     | 9.33            | 44.8                |
| Village 2 | 16-Dec-15 | 8.8  | 824        | 7.56      | 9.59            | 23.6                |
| Village 2 | 22-Dec-15 | 8.7  | 942        | 7.59      | 10.81           | 689.3               |
| Village 2 | 30-Dec-15 | 8.6  | 1020       | 7.76      | 10.8            | 6.3                 |
| Village 2 | 5-Jan-16  | 8.6  | 1001       | 7.62      | 10.9            | 4.1                 |
| Village 2 | 13-Jan-16 | 8.5  | 1079       | 7.98      | 12.9            | 20.1                |
| Village 2 | 20-Jan-16 | 8.6  | 1118       | 8.4       | 6.89            | 4.1                 |
| Village 2 | 16-Mar-16 | 8.6  | 1197       | 7.9       | 7.04            | 9.79                |
| Village 2 | 3-Feb-16  | 8.6  | 1197       | 7.74      | 7.94            | 9.5                 |
| Village 2 | 10-Feb-16 | 8.6  | 1256       | 7.35      | 10.7            | 31                  |
| Village 2 | 17-Feb-16 | 8.5  | 1334       | 7.86      | 13.5            | 10                  |
| Village 2 | 25-Feb-16 | 8.5  | 1315       | 8.72      | 13.4            | 63                  |
| Village 2 | 3-Feb-16  | 8.3  | 1530       | 7.77      | 10              | 5.2                 |
| Village 2 | 10-Mar-16 | 8.1  | 1785       | 6.55      | 9.12            | 27.2                |
| Village 2 | 16-Mar-16 | 8.2  | 1197       | 7.9       | 7.03            | 13.2                |
| Village 2 | 22-Mar-16 | 8.1  | 1354       | 5.12      | 11.8            | 17.1                |
| Village 2 | 27-Mar-16 | 7.9  | 1236       | 6.57      | 7.41            | 12.1                |
| Village 2 | 2-Apr-16  | 8.1  | 1309       | 6.78      | 7.65            | 378.4               |
| Village 2 | 9-Apr-16  | 8.2  | 2943       | 5.57      | 10              | 184.2               |
| Village 2 | 20-Apr-16 | 7.9  | 2747       | 5.75      | 4.78            | 913.9               |
| Village 2 | 26-Apr-16 | 7.7  | 1785       | 6.29      | 1.72            | 1011.2              |
| Village 2 | 4-May-16  | 9.1  | 844        | 6.5       | 6.05            | 19.9                |
| Village 2 | 11-May-16 | 9.2  | 589        | 6.55      | 7.71            | 53                  |
| Village 2 | 18-May-16 | 8.7  | 216        | 6.97      | 23.6            | 26.9                |
| Village 2 | 25-May-16 | 8.8  | 275        | 4.66      | 6.35            | 4.1                 |
| Village 2 | 2-Jun-16  | 9.2  | 314        | 4.73      | 9.98            | 35                  |
| Village 2 | 7-Jun-16  | 9.21 | 432        | 5.45      | 6.93            | 32.8                |
| Village 2 | 15-Jun-16 | 9.16 | 549        | 8.34      | 32.4            | 43.9                |
| Village 2 | 22-Jun-16 | 9.04 | 530        | 7.58      | 7.86            | 2                   |
| Village 2 | 29-Jun-16 | 8.99 | 608        | 9.13      | 8.56            | 4.1                 |
| Village 2 | 6-Jul-16  | 8.22 | 196        | 7.73      | 42.2            | 574.8               |
| Village 2 | 15-Jul-16 | 8.17 | 196        | 10.11     | 75.3            | 183.5               |
| Village 2 | 23-Jul-16 | 7.35 | 353        | 5.56      | 7.22            | 140.3               |
| Village 2 | 28-Jul-16 | 8    | 353        | 5.6       | 12.1            | 137                 |
| Village 2 | 3-Aug-16  | 8.21 | 275        | 5.67      | 22.4            | 960.6               |
| Village 2 | 19-Aug-16 | 8.35 | 353        | 6.13      | 21.3            | 913.9               |
| Village 2 | 26-Aug-16 | 7.61 | 275        | 7.61      | 8.34            | 40.6                |
| Village 2 | 30-Aug-16 | 8.2  | 255        | 5.85      | 6.49            | 129.6               |
| Village 2 | 8-Sep-16  | 8.46 | 314        | 5.67      | 4.6             | 1                   |
| Village 2 | 17-Sep-16 | 7.28 | 589        | 6.22      | 3.05            | 6.2                 |
| Village 2 | 20-Sep-16 | 7.9  | NA         | 7.74      | 17.2            | 281.2               |
| Village 2 | 27-Sep-16 | 8.28 | NA         | 6.48      | 36.5            | 343                 |
| Village 2 | 5-Oct-16  | 8.06 | NA         | 5.98      | 6.89            | 121.2               |
| Village 2 | 14-Oct-16 | 8.3  | NA         | 5.51      | 9.45            | 4.1                 |
| Village 2 | 18-Oct-16 | 8.66 | 412        | 6.91      | 6.55            | 5.2                 |
| Village 2 | 28-Oct-16 | 8.72 | 569        | 6.48      | 5.26            | 2                   |
| Village 2 | 3-Nov-16  | 8.23 | 451        | 6.64      | 12.3            | 4.1                 |
| Village 2 | 7-Nov-16  | 9.34 | 491        | 7.15      | 4.48            | 1                   |
| Village 2 | 14-Nov-16 | 8.12 | 1040       | 6.02      | 0.84            | 0.5                 |
| Village 2 | 21-Nov-16 | 8.34 | 667        | 6.95      | 4.59            | 5.1                 |
| Village 2 | 28-Nov-16 | 8.34 | 667        | 7.08      | 4.55            | 70.3                |
| Village 2 | 5-Dec-16  | 8.8  | 706        | 5.73      | 4.08            | 60.3                |
| Village 2 | 16-Dec-16 | 8.53 | 746        | 7.74      | 3.12            | 93.3                |
| Village 2 | 23-Dec-16 | 8.3  | 687        | 5.42      | 4.86            | 8.4                 |
| Village 2 | 30-Dec-16 | 8.9  | 765        | 5.37      | 2.2             | 15.3                |
| Village 2 | 4-Jan-17  | 8.26 | 667        | 5.05      | 9.89            | 15.3                |
| Village 2 | 11-Jan-17 | 8.4  | 785        | 6.85      | 5.97            | 10.7                |
| Village 2 | 19-Jan-17 | 8.03 | 746        | 4.40      | 1.89            | 0.5                 |
| Village 2 | 23-Jan-17 | 8.48 | 885        | 5.47      | 3.12            | 2419.6              |
| Village 2 | 30-Jan-17 | 8.57 | 863        | 6.29      | 2.04            | 2419.6              |
| Village 2 | 6-Feb-17  | 8.6  | 804        | 6.34      | 4.37            | 2                   |
| Village 2 | 13-Feb-17 | 8.43 | 844        | 7.48      | 7.98            | 111.8               |
| Village 2 | 20-Feb-17 | 8.2  | 824        | 6.25      | 0.67            | 9.4                 |
| Village 2 | 27-Feb-17 | 8.46 | 903        | 6.52      | 1.91            | 2419.6              |
| Village 2 | 6-Mar-17  | 8.68 | 1099       | 7.26      | 6.86            | 77.1                |
| Village 2 | 13-Mar-17 | 7.96 |            |           |                 |                     |

| Location  | Date      | pH   | EC (µS/cm) | DO (mg/L) | Turbidity (NTU) | E.coli (MPN/100 ml) |
|-----------|-----------|------|------------|-----------|-----------------|---------------------|
| Village 3 | 22-Nov-15 | 8.63 | 1844       | 7.94      | 19.4            |                     |
| Village 3 | 30-Nov-15 | 8.89 | 981        | 9.1       | 12.8            | 263.8               |
| Village 3 | 7-Dec-15  | 8.6  | 1020       | 7.94      | 8.11            | 20.9                |
| Village 3 | 14-Dec-15 | 8.6  | 981        | 10.9      | 12              | 93.3                |
| Village 3 | 21-Dec-15 | 9    | 981        | 7.72      | 10.2            | 5.2                 |
| Village 3 | 28-Dec-15 | 8.3  | 1373       | 6.61      | 12.2            | 8.6                 |
| Village 3 | 4-Jan-16  | 8.5  | 1452       | 6.47      | 7.47            | 13.5                |
| Village 3 | 11-Jan-16 | 8.8  | 1413       | 8.16      | 13.1            | 50.4                |
| Village 3 | 19-Jan-16 | 8.7  | 1530       | 8.34      | 14.3            | 28.5                |
| Village 3 | 27-Jan-16 | 8.3  | 1746       | 7.6       | 11.4            | 13.1                |
| Village 3 | 2-Jan-16  | 8.6  | 1785       | 7.19      | 10.2            | 90.8                |
| Village 3 | 8-Feb-16  | 8.7  | 1805       | 6.96      | 9.01            | 30                  |
| Village 3 | 14-Feb-16 | 8.5  | 2040       | 7.34      | 16.4            | 20                  |
| Village 3 | 22-Feb-16 | 8.4  | 2119       | 4.57      | 5.75            | 10                  |
| Village 3 | 29-Feb-16 | 8.1  | 2197       | 6.64      | 7.4             | 41                  |
| Village 3 | 7-Mar-16  | 8.5  | 2001       | 6.98      | 5.72            | 75.4                |
| Village 3 | 14-Mar-16 | 8.7  | 2158       | 6.18      | 6.62            | 10.9                |
| Village 3 | 21-Mar-16 | 8.6  | 2158       | 5.58      | 7.69            | 436                 |
| Village 3 | 28-Mar-16 | 8.3  | 2158       | 6.65      | 9.03            | 396.8               |
| Village 3 | 4-Apr-16  | 7.7  | 2943       | 5.1       | 4.36            | 71.4                |
| Village 3 | 11-Apr-16 | 7.5  | 2747       | 5.46      | 6.32            | 29.2                |
| Village 3 | 18-Apr-16 | 7.8  | 2080       | 6.89      | 4.26            | 44.3                |
| Village 3 | 27-Apr-16 | 7.6  | 1099       | 5.41      | 0.65            | 871.4               |
| Village 3 | 2-May-16  | 8.4  | 2943       | 9.69      | 2.8             | 78.4                |
| Village 3 | 9-May-16  | 9.2  | 491        | 6.59      | 7.71            | 55.6                |
| Village 3 | 16-May-16 | 8.6  | 216        | 7.12      | 16.2            | 29.1                |
| Village 3 | 23-May-16 | 8.8  | 235        | 7.35      | 8.21            | 3.1                 |
| Village 3 | 30-May-16 | 8.9  | 392        | 5.14      | 3.5             | 343                 |
| Village 3 | 6-Jun-16  | 9.1  | 647        | 5.04      | 6.87            | 0.5                 |
| Village 3 | 13-Jun-16 | 8.4  | 471        | 7.12      | 14.6            | 64.6                |
| Village 3 | 20-Jun-16 | 8.25 | 451        | 7.23      | 4.24            | 2                   |
| Village 3 | 30-Jun-16 | 9.28 | 647        | 7.47      | 10.8            | 360.9               |
| Village 3 | 4-Jul-16  | 8.5  | 216        | 10.51     | 31.4            | 280.9               |
| Village 3 | 16-Jul-16 | 8.04 | 196        | 8.14      | 25.2            | 1011.2              |
| Village 3 | 19-Jul-16 | 8.14 | 275        | 8.03      | 21.8            | 110.2               |
| Village 3 | 29-Jul-16 | 8.14 | 373        | 6         | 10.1            | 62                  |
| Village 3 | 5-Aug-16  | 8.25 | 275        | 6.14      | 52.2            | 689.3               |
| Village 3 | 8-Aug-16  | 7.82 | 255        | 6.67      | 39.8            | 396.8               |
| Village 3 | 19-Aug-16 | 8.23 | 334        | 6.25      | 11.3            | 360.9               |
| Village 3 | 23-Aug-16 | 7.84 | 353        | 6.35      | 13.9            | 64.1                |
| Village 3 | 2-Sep-16  | 8.36 | 353        | 6.28      | 2.69            | 31.5                |
| Village 3 | 7-Sep-16  | 8.65 | 314        | 7.22      | 6.85            | 3                   |
| Village 3 | 14-Sep-16 | 7.05 | 353        | 6.03      | 9.8             | 17.3                |
| Village 3 | 19-Sep-16 | 8.13 | 314        | 4.77      | 7.32            | 9.7                 |
| Village 3 | 4-Oct-16  | 8.02 | NA         | 6.1       | 5.35            | 35                  |
| Village 3 | 4-Oct-16  | 7.74 | NA         | 5.46      | 7.55            | 42.5                |
| Village 3 | 14-Oct-16 | 8.59 | 412        | 7.1       | 1.98            | 11.6                |
| Village 3 | 19-Oct-16 | 7.22 | 530        | 7.24      | 5.57            | 9.7                 |
| Village 3 | 24-Oct-16 | 8.12 | 451        | 5.43      | 2.47            | 0.5                 |
| Village 3 | 2-Nov-16  | 8.69 | 471        | 8.70      | 2.54            | 8.6                 |
| Village 3 | 8-Nov-16  | 8.93 | 549        | 5.45      | 16.4            | 2                   |
| Village 3 | 14-Nov-16 | 8.44 | 824        | 6.86      | 3.1             | 4.1                 |
| Village 3 | 22-Nov-16 | 8.24 | 706        | 7.09      | 4.89            | 4                   |
| Village 3 | 29-Nov-16 | 8.49 | 765        | 5.05      | 3.16            | 4.1                 |
| Village 3 | 6-Dec-16  | 8.5  | 785        | 5.03      | 2.39            | 8.3                 |
| Village 3 | 17-Dec-16 | 8.52 | 883        | 6.01      | 5.29            | 6.3                 |
| Village 3 | 23-Dec-16 | 8.57 | 903        | 7.14      | 1.96            | 2                   |
| Village 3 | 29-Dec-16 | 8.2  | 1020       | 7.36      | 3.44            | 3                   |
| Village 3 | 3-Jan-17  | 8.2  | 1040       | 7.77      | 2.16            | 15.8                |
| Village 3 | 11-Jan-17 | 8.29 | 1040       | 7.15      | 2.04            | 2                   |
| Village 3 | 20-Jan-17 | 8.33 | 1158       | 6.88      | 10.3            | 2                   |
| Village 3 | 27-Jan-17 | 8.25 | 1118       | 7.43      | 3.2             | 13.1                |
| Village 3 | 31-Jan-17 | 8.31 | 1256       | 5.73      | 3.26            | 93.6                |
| Village 3 | 7-Feb-17  | 8.48 | 1020       | 6.16      | 33.6            | 14                  |
| Village 3 | 14-Feb-17 | 8.6  | 1059       | 6.30      | 8.23            | 8.4                 |
| Village 3 | 21-Feb-17 | 8.77 | 1315       | 5.77      | 5.88            | 7.5                 |
| Village 3 | 28-Feb-17 | 8.52 | 1295       | 5.82      | 5               | 11                  |
| Village 3 | 7-Mar-17  | 8.39 | 1432       | 5.58      | 1.11            | 0.5                 |
| Village 3 | 14-Mar-17 | 8.02 | 1491       | 6.01      | 72.9            | 62                  |
| Village 3 | 16-Mar-17 | 8.04 | 1884       | 6.86      | 6.67            | 2                   |
| Village 3 | 22-Mar-17 | 8.21 | 1805       | 6.99      | 14.8            | 57.1                |
| Village 3 | 31-Mar-17 | 8.31 | 1844       | 6.54      | 7.41            | 35                  |
| Village 3 | 7-Apr-17  | 8.14 | 1903       | 6.81      | 5.36            | 19.3                |
| Village 3 | 12-Apr-17 | 8.07 | 1884       | 6.30      | 3.47            | 12                  |
| Village 3 | 21-Apr-17 | 8.12 | 1805       | 6.37      | 9.41            | 22.3                |
| Village 3 | 1-May-17  | 8.59 | 510        | 7.14      | 6.08            | 7.3                 |
| Village 3 | 16-May-17 | 8.3  | 863        | 6.92      | 14.7            | 0.5                 |
| Village 3 | 18-May-17 | 8.29 | 863        | 5.15      | 9.8             | 14.8                |
| Village 3 | 23-May-17 | 8.5  | 1197       | 5.73      | 10.6            | 7.3                 |
| Village 3 | 30-May-17 | 7.99 | 1236       | 4.81      | 13.1            | 23.7                |
| Village 3 | 6-Jun-17  | 8.67 | 412        | 5.20      | 14.1            | 0.5                 |
| Village 3 | 13-Jun-17 | 8.44 | 412        | 5.48      | 12.2            | 365.4               |
| Village 3 | 20-Jun-17 | 8.46 | 863        | 5.61      | 13.8            | 0.5                 |
| Village 3 | 27-Jun-17 | 8.44 | 647        | 7.01      | 69.4            | 44.3                |
| Village 3 | 4-Jul-17  | 8.23 | 549        | 6.34      | 35.3            | 0.5                 |
| Village 3 | 17-Jul-17 | 7.88 | 196        | 5.59      | 19.3            | 123.6               |
| Village 3 | 1-Aug-17  | 8.23 | 255        | 4.80      | 20.2            | 547.4               |
| Village 3 | 8-Aug-17  | 7.85 | 804        | 5.13      | 42.1            | 60.9                |
| Village 3 | 15-Aug-17 | 8.09 | 589        | 5.48      | 20.1            | 31.1                |
| Village 3 | 22-Aug-17 | 7.96 | 785        | 5.42      | 18.9            | 34.5                |
| Village 3 | 24-Aug-17 | 7.92 | 667        | 4.85      | 10.12           | 54.5                |
| Village 3 | 29-Aug-17 | 7.91 | 785        | 5.31      | 18.4            | 344.8               |
| Village 3 | 5-Sep-17  | 7.9  | 255        | 5.03      | 12.6            | 40.5                |
| Village 3 | 12-Sep-17 | 8.1  | 373        | 4.98      | 6.85            | 21.6                |
| Village 3 | 19-Sep-17 | 8.16 | 432        | 5.13      | 8.61            | 51.2                |
| Village 3 | 26-Sep-17 | 8.24 | 412        | 5.63      | 6.24            | 22.8                |
| Village 3 | 3-Oct-17  | 7.96 | 471        | 5.78      | 6.44            | 63.8                |
| Village 3 | 10-Oct-17 | 8.19 | 373        | 5.71      | 8.23            | 22.3                |
| Village 3 | 17-Oct-17 | 8.1  | 412        | 5.85      | 10.1            | 26.9                |
| Village 3 | 24-Oct-17 | 7.45 | 863        | 5.04      | 5.71            | 51.2                |
| Village 3 | 3-Nov-17  | 8.65 | 589        | 5.64      | 9.46            | 613.1               |
| Village 3 | 7-Nov-17  | 8.13 | 824        | 5.79      | 10.2            | 360.9               |
| Village 3 | 14-Nov-17 | 8.98 | 883        | 6.37      | 3.21            | 26.5                |
| Village 3 | 21-Nov-17 | 8.49 | 922        | 6.56      | 4.14            | 18.7                |
| Village 3 | 28-Nov-17 | 8.09 | 922        | 7.09      | 11.8            | 10.7                |
| Village 3 | 5-Dec-17  | 8.91 | 903        | 4.44      | 4.09            | 160.7               |
| Village 3 | 12-Dec-17 | 8.25 | 1216       | 6.23      | 0.37            | 114.5               |
| Village 3 | 21-Dec-17 | 8.72 | 1275       | 5.11      | 1.23            | 10.9                |
| Village 3 | 26-Dec-17 | 8.29 | 883        | 6.20      | 18.2            | 95.9                |

| Location  | Date      | pH   | EC (µS/cm) | DO (mg/L) | Turbidity (NTU) | E.coli (MPN/100 ml) |
|-----------|-----------|------|------------|-----------|-----------------|---------------------|
| Village 4 | 22-Nov-15 | 8.54 | 1825       | 8.36      | 9.37            |                     |
| Village 4 | 30-Nov-15 | 8.57 | 1903       | 11.13     | 36              | 104.2               |
| Village 4 | 7-Dec-15  | 8.4  | 2158       | 8.19      | 17.1            | 53.7                |
| Village 4 | 14-Dec-15 | 8.9  | 2158       | 10.71     | 8.8             | 33.6                |
| Village 4 | 21-Dec-15 | 8.6  | 2354       | 7.56      | 14.6            | 135.4               |
| Village 4 | 28-Dec-15 | 8.4  | 2551       | 7.51      | 12.9            | 129.6               |
| Village 4 | 4-Jan-16  | 8.4  | 2747       | 7.74      | 14.9            | 25.9                |
| Village 4 | 11-Jan-16 | 8.2  | 2747       | 5.76      | 3.03            | 56.8                |
| Village 4 | 18-Jan-16 | 8.7  | 1452       | 7.2       | 13.2            | 83.9                |
| Village 4 | 27-Jan-16 | 8.3  | 1922       | 7.32      | 15.2            | 21.6                |
| Village 4 | 2-Jan-16  | 8.2  | 2551       | 7.39      | 11.4            | 35.9                |
| Village 4 | 8-Feb-16  | 8.3  | 3139       | 7.19      | 19.3            | 31                  |
| Village 4 | 15-Feb-16 | 8.1  | 2747       | 5.71      | 6.86            | 158                 |
| Village 4 | 22-Feb-16 | 8.9  | 4905       | 4.28      | 16              | 52                  |
| Village 4 | 29-Feb-16 | 8.2  | 2276       | 3.98      | 5.74            | 908                 |
| Village 4 | 7-Mar-16  | 8.8  | 4120       | 4.68      | 6.88            | 83.6                |
| Village 4 | 15-Mar-16 | 8.6  | 3728       | 5.25      | 7.34            | 4.1                 |
| Village 4 | 21-Mar-16 | 8.8  | 2943       | 6.01      | 9.62            | 549.3               |
| Village 4 | 28-Mar-16 | 8.7  | 4513       | 6.47      | 10.3            | 689.3               |
| Village 4 | 4-Apr-16  | 7.6  | 2747       | 6.52      | 10.9            | 119.6               |
| Village 4 | 11-Apr-16 | 7.9  | 2551       | 5.2       | 0.98            | 100.6               |
| Village 4 | 18-Apr-16 | 8.6  | 2747       | 7.6       | 1.38            | 4.1                 |
| Village 4 | 27-Apr-16 | 7.6  | 2158       | 6.18      | 2.32            | 1011.2              |
| Village 4 | 2-May-16  | 8.5  | 3335       | 10.68     | 2.55            | 95.9                |
| Village 4 | 9-May-16  | 8.2  | 2158       | 8.24      | 7.58            | 8.6                 |
| Village 4 | 16-May-16 | 8.2  | 235        | 7.74      | 26              | 36.4                |
| Village 4 | 23-May-16 | 8.8  | 608        | 5.93      | 19.5            | 13.1                |
| Village 4 | 1-Jun-16  | 9    | 824        | 4.86      | 13.6            | 62.9                |
| Village 4 | 9-Jun-16  | 9.1  | 961        | 4.6       | 10.6            | 46.4                |
| Village 4 | 14-Jun-16 | 9.2  | 589        | 7.93      | 15.2            | 53.6                |
| Village 4 | 21-Jun-16 | 9.12 | 530        | 7.97      | 12.1            | 23.8                |
| Village 4 | 30-Jun-16 | 9.14 | 1099       | 8.83      | 19.1            | 1                   |
| Village 4 | 9-Jul-16  | 8.61 | 196        | 7.89      | 14.4            | 74.3                |
| Village 4 | 13-Jul-16 | 8.5  | 235        | 8.1       | 78.2            | 214                 |
| Village 4 | 18-Jul-16 | 8.41 | 275        | 7.64      | 15.2            | 78                  |
| Village 4 | 26-Jul-16 | 8.75 | 746        | 6.74      | 6.51            | 18.3                |
| Village 4 | 1-Aug-16  | 9.06 | 412        | 7.54      | 6.13            | 12.8                |
| Village 4 | 8-Aug-16  | 7.65 | 294        | 5.72      | 36              | 1011.2              |
| Village 4 | 20-Aug-16 | 8.56 | 412        | 6.27      | 12.1            | 2                   |
| Village 4 | 29-Aug-16 | 8.43 | 922        | 6.49      | 13.6            | 7.4                 |
| Village 4 | 7-Sep-16  | 8.9  | 353        | 5.71      | 4.76            | 95.9                |
| Village 4 | 17-Sep-16 | 8.11 | 687        | 7.14      | 49.1            | 5.2                 |
| Village 4 | 19-Sep-16 | 8.76 | 706        | 5.93      | 96.8            | 28.5                |
| Village 4 | 1-Oct-16  | 8.12 | NA         | 6.26      | 11.6            | 21.1                |
| Village 4 | 4-Oct-16  | 8.01 | NA         | 5.5       | 13.8            | 13.9                |
| Village 4 | 13-Oct-16 | 8.61 | NA         | 7.16      | 12.7            | 2                   |
| Village 4 | 20-Oct-16 | 8.26 | 687        | 6.4       | 8.61            | 0.5                 |
| Village 4 | 24-Oct-16 | 8.07 | 2394       | 4.72      | 6.68NTU         | 8.6                 |
| Village 4 | 3-Nov-16  | 8.62 | 608        | 7.80      | 3.77            | 4.1                 |
| Village 4 | 10-Nov-16 | 7.32 | 844        | 5.31      | 14.2            | 0.5                 |
| Village 4 | 17-Nov-16 | 8.49 | 903        | 6.05      | 64              | 6.2                 |
| Village 4 | 24-Nov-16 | 8.49 | 981        | 4.88      | 11.2            | 3.1                 |
| Village 4 | 1-Dec-16  | 8.38 | 1079       | 4.86      | 7.66            | 2                   |
| Village 4 | 8-Dec-16  | 8.43 | 1216       | 5.54      | 3.33            | 4.1                 |
| Village 4 | 17-Dec-16 | 8.22 | 1432       | 7.04      | 8.11            | 10.9                |
| Village 4 | 22-Dec-16 | 8.52 | 1432       | 6.87      | 9.4             | 401                 |
| Village 4 | 28-Dec-16 | 8.49 | 1550       | 7.33      | 10.7            | 24.9                |
| Village 4 | 6-Jan-17  | 8.37 | 1609       | 7.45      | 2.9             | 7.3                 |
| Village 4 | 11-Jan-17 | 8.5  | 1491       | 7.17      | 9.44            | 23.8                |
| Village 4 | 20-Jan-17 | 8.51 | 1589       | 7.51      | 5.31            | 4.1                 |
| Village 4 | 27-Jan-17 | 8.47 | 1472       | 6.79      | 0.89            | 0.5                 |
| Village 4 | 31-Jan-17 | 8.5  | 1550       | 7.35      | 0.9             | 0.5                 |
| Village 4 | 9-Feb-17  | 8.2  | 1589       | 5.50      | 6.87            | 8.5                 |
| Village 4 | 16-Feb-17 | 8.66 | 1766       | 6.77      | 8.46            | 14.5                |
| Village 4 | 23-Feb-17 | 8.11 | 1609       | 4.08      | 1.43            | 31.5                |
| Village 4 | 2-Mar-17  | 8.3  | 1687       | 5.96      | 19.3            | 7.5                 |
| Village 4 | 9-Mar-17  | 8.5  | 1707       | 5.11      | 9.78            | 2                   |
| Village 4 | 16-Mar-17 | 8.34 | 1766       | 6.86      | 12.4            | 58.1                |
| Village 4 | 17-Mar-17 | 8.15 | 1746       | 5.95      | 5.58            | 62.7                |
| Village 4 | 24-Mar-17 | 8.22 | 1687       | 7.28      | 17.4            | 63.7                |
| Village 4 | 30-Mar-17 | 8.1  | 1805       | 6.87      | 16.2            |                     |



| Location            | Date       | pH  | EC<br>( $\mu\text{S}/\text{cm}$ ) | T<br>( $^{\circ}\text{C}$ ) | Turbidity<br>(NTU) | E.coli<br>MPN/100 ml |
|---------------------|------------|-----|-----------------------------------|-----------------------------|--------------------|----------------------|
| Shallow Groundwater |            |     |                                   |                             |                    |                      |
| Village 1 HP        | 12/21/2017 | 8.1 | 8692                              | 25°C                        | 3.1                | 2.0                  |
| Village 1 BW        | 12/21/2017 | 8.6 | 3198                              | 25°C                        | 1.0                | 0.0                  |
| Village 1 BW        | 2/15/2018  | 7.7 | 5297                              | 25°C                        | 2.0                | 0.0                  |
| Village 2 HP        | 12/21/2017 | 8.2 | 6416                              | 25°C                        | 11.9               | 2.0                  |
| Village 2 HP        | 2/15/2018  | 7.0 | 6475                              | 25°C                        | 11.1               | 0.0                  |
| Village 2 BW        | 12/21/2017 | 8.5 | 3865                              | 25°C                        | 3.6                | 17.3                 |
| Village 2 BW        | 2/15/2018  | 7.5 | 2963                              | 25°C                        | 9.3                | 5.2                  |
| Village 4 HP        | 12/21/2017 | 8.0 | 4925                              | 25°C                        | 0.9                | 0.0                  |
| Village 4 HP        | 2/15/2018  | 7.3 | 4336                              | 25°C                        | 2.2                | 0.0                  |
| Village 4 HP        | 2/10/2017  | 7.6 | 3178                              | 27°C                        | 2.5                | 0.0                  |
| Village 4 HP        | 12/21/2017 | 8.0 | 4513                              | 25°C                        | 2.8                | 0.0                  |
| Village 4 HP        | 2/15/2018  | 7.3 | 5023                              | 25°C                        | 2.6                | 1.0                  |
